# Supplementary material
Source: ML conference proceedings conference paper supplement (https://openaccess.thecvf.com/content/ICCV2023/html/Li_DenseShift_Towards_Accurate_ICCV_2023_paper.html)
Supplement: Supplementary file 1 [file Li_DenseShift_Towards_Accurate_ICCV_2023_supplemental.pdf]

## A. Proof of Theorems

**Theorem 1.** Suppose a shift neural network in the form  $\hat{f}_{\mathbf{w}}(\mathbf{x}) = \sum_{j=1}^J \sum_{k=1}^{d_j} w_k^j h_k^j(\mathbf{x})$ , where  $w_k^j \in \{0\} \cup \{\pm 2^p\}$  approximates the true unknown function  $f(\mathbf{x})$ ,  $\mathbf{x} \in \mathbb{R}^d$ . There is another dense neural network with  $w_k^{j'} \in \{\pm 2^p\}$  that has a similar form  $\hat{f}_{\mathbf{w}'}(\mathbf{x}) = \sum_{j=1}^J \sum_{k=1}^{d_j} \mathbf{w}_k^{j'} h_k^{j'}(\mathbf{x})$ , such that  $\forall \mathbf{x} \in \mathbb{R}^d$ ,  $\hat{f}_{\mathbf{w}}(\mathbf{x}) = \hat{f}_{\mathbf{w}'}(\mathbf{x})$ .

*Proof.* The proof is straightforward by isolating zero shifts, and recreating these null weights in a larger dense shift network with opposite weight signs. Define the  $j^{\text{th}}$  layer as

$$h^j(\mathbf{x}) = a(\mathbf{W}^j h^{j-1}(\mathbf{x}) + \mathbf{b}^j),$$

where  $h^0(\mathbf{x}) = \mathbf{x}$ ,  $J$  is the total number of layers each of output dimension  $d_j$  and  $\mathbf{W}$  of size  $d_j \times d_{j-1}$  can be a Toeplitz matrix for a convolutional layer,  $a(\cdot)$  is the activation function, and  $\mathbf{b}$  is the bias term. Define the shift network approximation of  $f(\mathbf{x})$  as

$$\hat{f}_{\mathbf{w}}(\mathbf{x}) = \sum_{j=1}^J \sum_{k=1}^{d_j} w_k^j h_k^j(\mathbf{x})$$

in which  $w_k^j \in \{0\} \cup \{\pm 2^p\}$  defines a shift network. We re-create an equivalent dense shift network by isolating null weights  $w_k^j = 0$  and replacing them with a larger dense shift network of an arbitrary weights but with opposite signs. Now suppose  $\mathbf{w}_0 = \{k \mid w_k^j = 0\}$  and  $\mathbf{w}_1 = \{k \mid w_k^j \neq 0\}$  where  $\mathbf{w} = [\mathbf{w}_0^\top \mathbf{w}_1^\top]^\top$ ,  $d_j = d_{0j} + d_{1j}$

$$\hat{f}_{\mathbf{w}}(\mathbf{x}) = \sum_{j=1}^J \left[ \sum_{k=1}^{d_{0j}} w_{0k}^j h_{0k}^j(\mathbf{x}) + \sum_{k=1}^{d_{1j}} w_{1k}^j h_{1k}^j(\mathbf{x}) \right].$$

Assume  $\tilde{\mathbf{w}} \in \{\pm 2^p\}$  is a nonzero shift arbitrary vector of elements  $\tilde{w}_{0k}$ ,

$$\begin{aligned} & \sum_{j=1}^J \left[ \sum_{k=1}^{d_{0j}} \mathbf{w}_{0k}^j h_{0k}^j(\mathbf{x}) + \sum_{k=1}^{d_{1j}} \mathbf{w}_{1k}^j h_{1k}^j(\mathbf{x}) \right] \\ &= \sum_{j=1}^J \left[ \sum_{k=1}^{d_{0j}} \tilde{\mathbf{w}}_k^j h_{0k}^j(\mathbf{x}) - \tilde{\mathbf{w}}_k^j h_{0k}^j(\mathbf{x}) + \sum_{k=1}^{d_{1j}} \mathbf{w}_{1k}^j h_{1k}^j(\mathbf{x}) \right]. \end{aligned}$$

By defining  $\mathbf{w}' = [\tilde{\mathbf{w}}, -\tilde{\mathbf{w}}, \mathbf{w}_0]$  of increased size  $d_j' = d_{0j} + d_j \geq d_j$ , one may rearrange terms and rewrite the neural approximate as

$$\hat{f}_{\mathbf{w}'}(\mathbf{x}) = \sum_{j=1}^J \sum_{k=1}^{d_j'} \mathbf{w}_k^{j'} h_k^{j'}(\mathbf{x}),$$

where  $h_k^{j'}$  is either  $h_{0k}^j$  or  $h_{1k}^j$  depending on the dense shift weight  $\mathbf{w}_k^{j'} \in \{\pm 2^p\}$ .  $\square$

**Theorem 2.** Dense shift network with a Lischitz activation function is a universal approximator on a compact set  $K$  for any measurable continuous function  $f \in C(K)$  with respect to the measure  $\mu$ , given that its weight and activations  $\mathbf{w}, h(\mathbf{x})$  remain close to the regular network in the following sense

$$\int_K \left( \sum_{j=1}^J \sum_{k=1}^{d_j} \left( \mathbf{w}_k^j h_k^j(\mathbf{x}) - \mathbf{w}_k^{j'} h_k^{j'}(\mathbf{x}) \right) \right)^2 d\mu < \frac{\epsilon}{4},$$

where  $\frac{\epsilon}{4}$  is the approximation quality of the regular neural network,  $(\mathbf{w}, h^j(\mathbf{x}))$  and  $(\mathbf{w}', h^{j'}(\mathbf{x}))$  are the weight and activations of the regular and DenseShift networks in layer  $j$ , respectively.

*Proof.* It is well-known that shallow networks are universal approximator [18] as well as deep networks [50]. These results holds in infinity norm, so is also valid in  $\ell_p$  norm with  $p < \infty$ . For the simplicity of the mathematical mechanics here we only focus on the multilayer perceptron [18] on  $\ell_2$  norm

$$\|f - \hat{f}\| = \int_K |f(\mathbf{x}) - \hat{f}(\mathbf{x})|^2 d\mu \quad (9)$$

Suppose  $\hat{f}_{\mathbf{w}}$  is a real weight neural network and  $\hat{f}_{\mathbf{w}'}$  is a dense shift version of the same network  $\hat{f}_{\mathbf{w}}$ , of course with weights  $\mathbf{w}' \in \{\pm 2^p\}$ .

$$\begin{aligned} & \|f - \hat{f}_{\mathbf{w}'}\| \\ &= \int_K |f(\mathbf{x}) - \hat{f}_{\mathbf{w}'}(\mathbf{x}) \pm \hat{f}_{\mathbf{w}}(\mathbf{x})|^2 d\mu \quad (10) \end{aligned}$$

$$= \int_K |f(\mathbf{x}) - \hat{f}_{\mathbf{w}}(\mathbf{x})|^2 d\mu \quad (11)$$

$$+ \int_K |\hat{f}_{\mathbf{w}}(\mathbf{x}) - \hat{f}_{\mathbf{w}'}(\mathbf{x})|^2 d\mu \quad (12)$$

$$+ 2 \int_K |[f(\mathbf{x}) - \hat{f}_{\mathbf{w}}(\mathbf{x})][\hat{f}_{\mathbf{w}}(\mathbf{x}) - \hat{f}_{\mathbf{w}'}(\mathbf{x})]| d\mu \quad (13)$$

In order to show that shift networks are universal approximator it is enough to show that  $\|f - \hat{f}_{\mathbf{w}'}\|$  is bounded by an arbitrarily small  $\epsilon > 0$ . The first term (11) is bounded by  $\frac{\epsilon}{4}$  [18]. The second term (12) is bounded given the shift net closeness assumption

$$\begin{aligned} & \int_K |\hat{f}_{\mathbf{w}}(\mathbf{x}) - \hat{f}_{\mathbf{w}'}(\mathbf{x})|^2 d\mu \\ &= \int_K \left( \sum_{j=1}^J \sum_{k=1}^{d_j} \mathbf{w}_k^j h_k^j(\mathbf{x}) - \sum_{j=1}^J \sum_{k=1}^{d_j} \mathbf{w}_k^{j'} h_k^{j'}(\mathbf{x}) \right)^2 d\mu \\ &< \frac{\epsilon}{4} \end{aligned}$$

The last term (13) is bounded by  $\frac{\epsilon}{2}$  thanks to the Cauchy-Schwartz inequality. So (9) is bounded by  $\epsilon$  by merging the pieces together.  $\square$
